# Supplementary material
Source: publisher figshare collection journal article supplement (https://acs.figshare.com/ndownloader/files/3613758)
Supplement: Supplementary file 1 [file 3613758]

## Supplementary Information

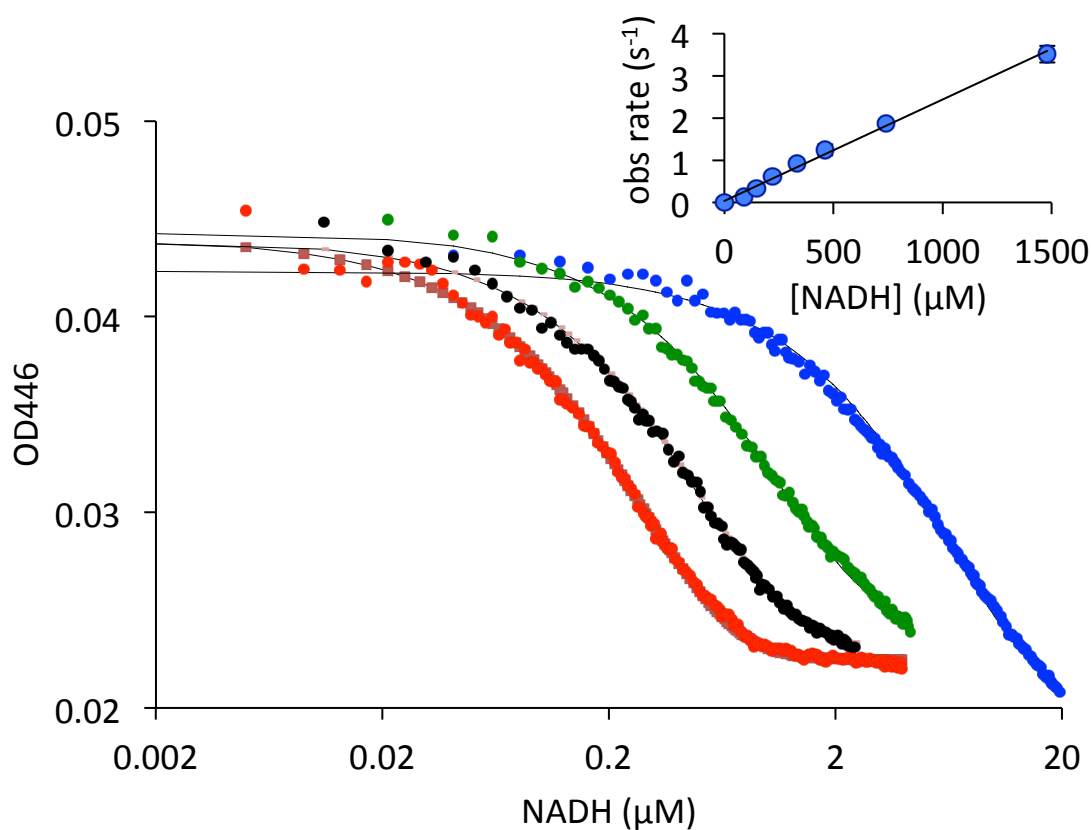

**Supplementary Figure 1.** Oxidized PCP hydroxylase ( $20 \mu\text{M}$ ) in the presence of PCP ( $25 \mu\text{M}$ ) was mixed with varying concentrations of NADH ( $0.2 - 8 \text{ mM}$ ) under anoxic conditions in a stopped flow. Representative datasets collected at  $446 \text{ nm}$  are shown. Symbols represent observed data points and the lines are derived from a best-fit using a single exponential. Final NADH concentrations were  $0.18 \text{ mM}$  (blue),  $0.66 \text{ mM}$  (green),  $1.5 \text{ mM}$  (black), and  $3.0 \text{ mM}$  (red). Replots derived from more extensive data sets, including replicates, are shown in the inset.

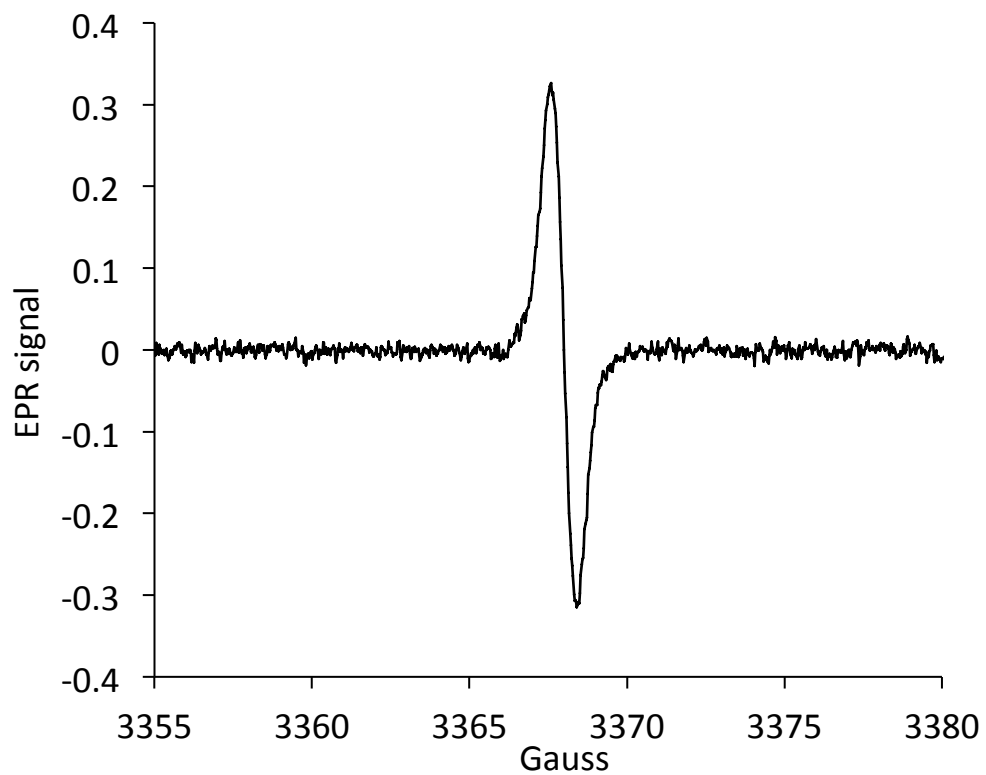

**Supplementary Figure 2.** EPR spectrum of TCSQ at 298 K. TCSQ was prepared from TCBQ and TCHQ as described in the Experimental Procedures section.

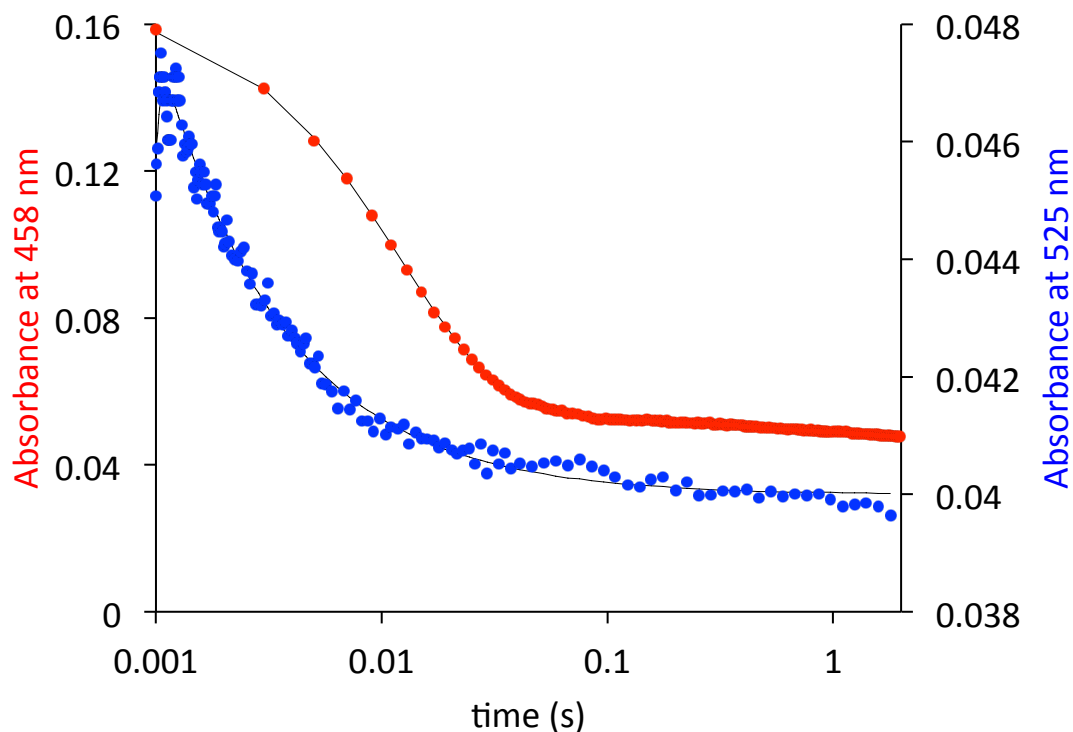

**Supplementary Figure 3.** TCBQ reductase ( $27 \mu\text{M}$ ) was mixed with NADH at saturating concentrations ( $100 - 200 \mu\text{M}$ , equal to  $9 - 18 \times K_m$ ) under anoxic conditions in the stopped-flow instrument. Representative time-courses at 458 and 525 nm are shown in blue and red, respectively, with the lines showing the fits to the data using two rate constants. The rate constant for the initial reduction and immediate formation of the  $\text{FMN}_{\text{SQ}} - \text{Fe}_2\text{S}_{2\text{red}}$  form of the enzyme ( $k_{1\text{D}} = 79 \text{ s}^{-1}$ ) is determined from the transient increase in absorbance at 525 nm (blue) and the decrease in absorbance at 458 nm (red). The second rate constant of  $k_{2\text{D}} = 2.7 \text{ s}^{-1}$  corresponds to the disappearance of the  $\text{FMN}_{\text{SQ}} - \text{FeS}_{\text{red}}$  form of the enzyme (decrease at 525 nm) in a disproportionation reaction between two  $\text{FMN}_{\text{SQ}} - \text{Fe}_2\text{S}_{2\text{red}}$  active sites to generate  $\text{FMN}_{\text{red}} - \text{Fe}_2\text{S}_{2\text{red}}$  and  $\text{FMN}_{\text{ox}} - \text{Fe}_2\text{S}_{2\text{red}}$ . The  $\text{FMN}_{\text{ox}} - \text{Fe}_2\text{S}_{2\text{red}}$  form of the enzyme does not accumulate to a detectable level, indicating

that the rate of reduction of the  $\text{FMN}_{\text{ox}} - \text{Fe}_2\text{S}_{2\text{red}}$  form by NADH must be significantly greater than  $2.7 \text{ s}^{-1}$  under these conditions. Consequently, the absorbance at 458 nm typical of oxidized flavins does not increase. Notably, the disproportionation of the  $\text{FMN}_{\text{SQ}} - \text{Fe}_2\text{S}_{2\text{red}}$  form is significantly faster for TCBQ reductase (complete in 2 sec) than it is in phthalate dioxygenase reductase (complete in 7 min), presumably because it can occur at least in part via intramolecular electron transfer in the trimeric TCBQ reductase, whereas disproportionation requires collision between two molecules of the monomeric phthalate dioxygenase reductase.

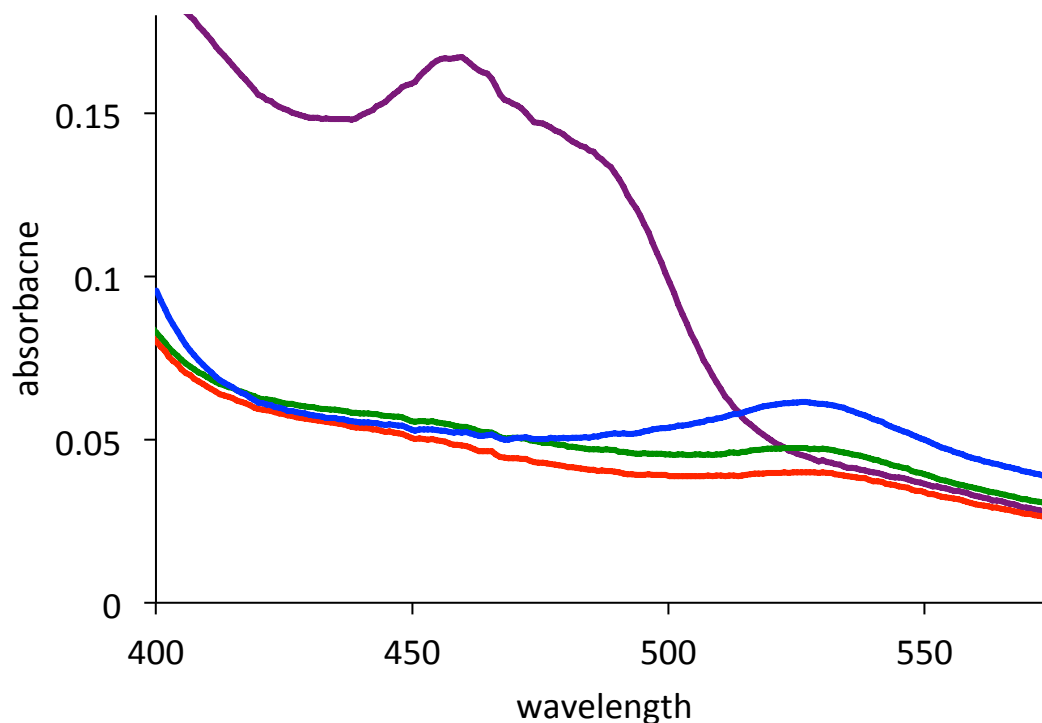

**Supplementary Figure 4.** Spectral intermediates observed during the reduction and re-oxidation of TCBQ reductase. The initial spectrum (purple) of the enzyme shows a maximum absorbance at 458 nm that is indicative of the oxidized FMN at the active site. The flavin absorbance decreases when the enzyme is reduced by NADH to generate the  $\text{FMN}_{\text{red}} - \text{Fe}_2\text{S}_{2\text{ox}}$  form, which rapidly undergoes electron transfer from the flavin to the iron-sulfur cluster to yield the  $\text{FMN}_{\text{SQ}} - \text{Fe}_2\text{S}_{2\text{red}}$  form, which has a characteristic absorbance at 525 nm (green). The spectrum of the final three-electron reduced form of TCBQ reductase ( $\text{FMN}_{\text{red}} - \text{Fe}_2\text{S}_{2\text{red}}$ ) is shown in red. The blue curve shows the spectrum of the  $\text{FMN}_{\text{SQ}} - \text{Fe}_2\text{S}_{2\text{red}}$  (two-electron reduced) form of TCBQ reductase produced by transfer of an electron from pre-reduced TCBQ reductase to  $\text{O}_2$ ; the assignment of this species as the  $\text{FMN}_{\text{SQ}} - \text{Fe}_2\text{S}_{2\text{red}}$  form was confirmed by EPR (see Supp. Fig. 6).

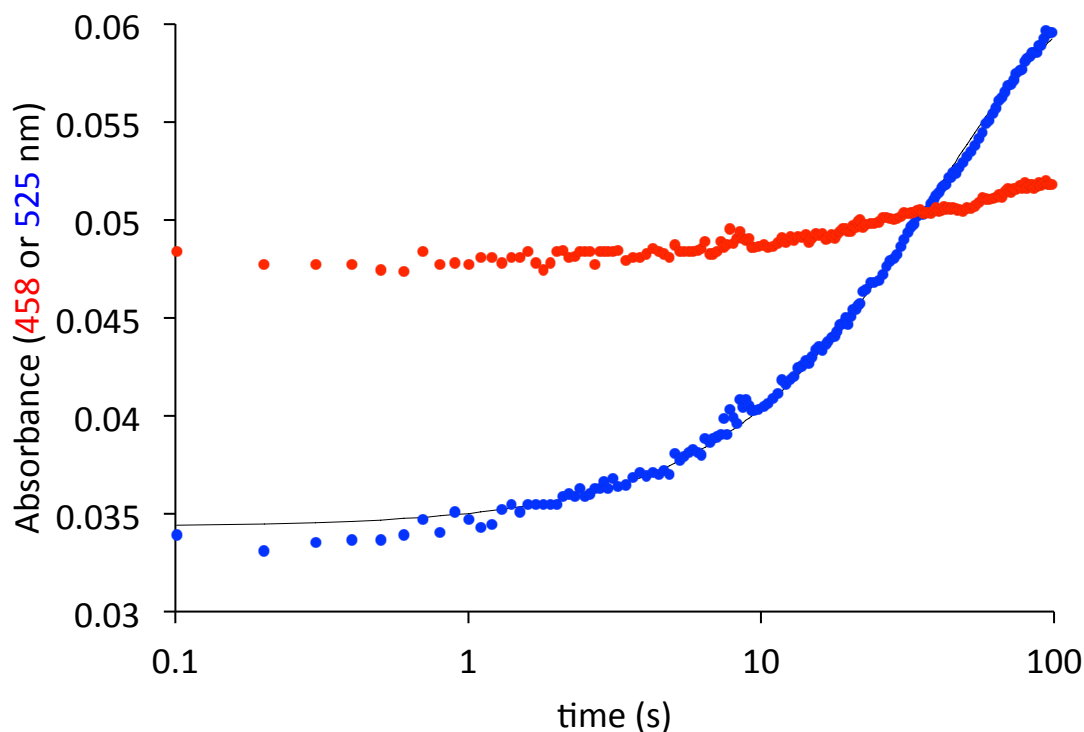

**Supplementary Figure 5.** Reduced TCBQ reductase (13.5  $\mu\text{M}$ ) prepared under anoxic conditions in the presence of excess NADH (100  $\mu\text{M}$ ) was mixed with oxygenated buffer (90  $\mu\text{M}$ ) in a stopped-flow apparatus. Representative traces at 458 and 525 nm are shown in red and blue, respectively. The line through the data represents fitting with a single exponential with ( $0.025\text{ s}^{-1}$ ). Notably, the  $\text{FMN}_{\text{SQ}}\text{-Fe}_2\text{S}_{2\text{red}}$  form of the protein accumulates slowly (as indicated by the increase in absorbance at 525 nm), but complete re-oxidation of the flavin (as indicated by the increase in absorbance at 458 nm) does not occur to a significant extent over 100 s.

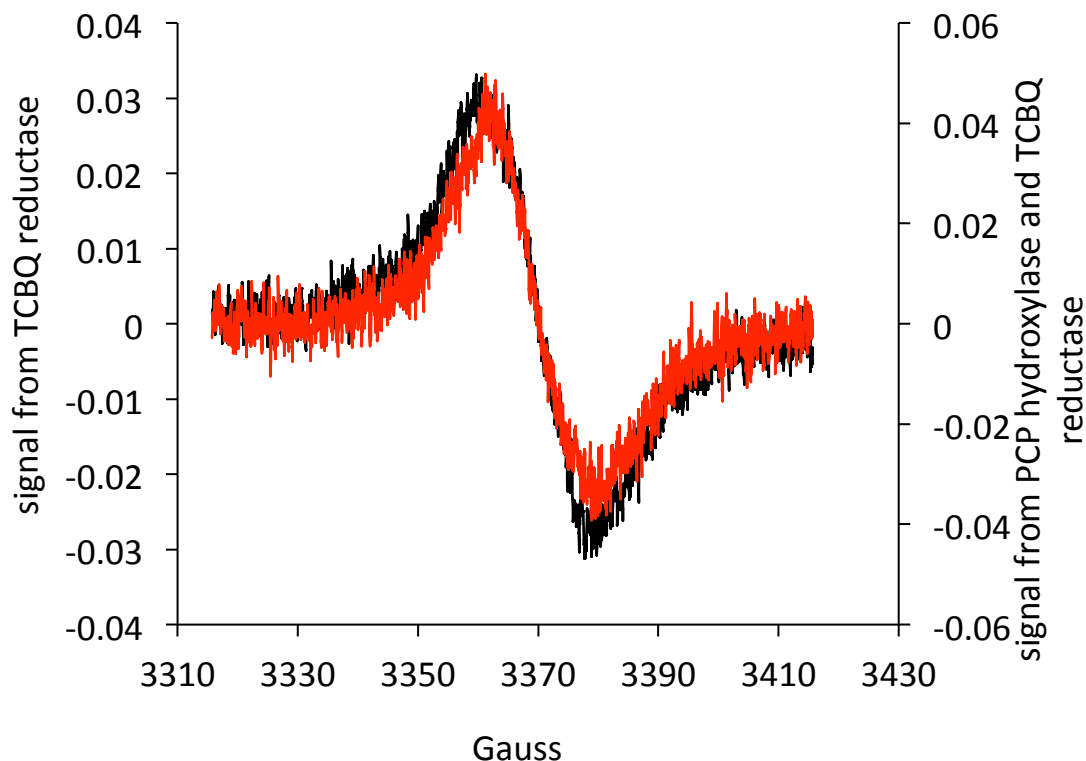

**Supplementary Figure 6.** The flavin semiquinone radical on TCBQ reductase ( $\text{FMN}_{\text{red}}-\text{Fe}_2\text{S}_{2\text{red}}$ ) generated during oxidation of TCBQ reductase alone (black) or during the PCP hydroxylase reaction in the presence of TCBQ reductase (red). The radical on TCBQ reductase alone was generated by pre-reducing enzyme ( $130\ \mu\text{M}$ ) with NADH ( $300\ \mu\text{M}$ ) under anoxic conditions followed by exposure to buffer containing  $\text{O}_2$  for 100 s and then freezing by immersion in liquid nitrogen. A typical flavin radical signal consisting of 0.24 equivalents (per enzyme-bound flavin) was observed with  $g = 2.0041$  and  $\Delta H = 19.1$  G. The radical formed during the PCP hydroxylase catalyzed reaction of PCP in the presence of one equivalent of TCBQ reductase was obtained by pre-reducing both enzymes ( $130\ \mu\text{M}$  each) with NAD(P)H ( $300\ \mu\text{M}$  each) under anoxic conditions at  $4^\circ\text{C}$  (to slow the reaction). The reaction was initiated by addition of one volume equivalent of oxygenated buffer and quenched after 20 sec by freezing in liquid nitrogen.
